# Supplementary material
Source: ML conference proceedings conference paper supplement (https://openaccess.thecvf.com/content/cvpr_2016/html/Danelljan_A_Probabilistic_Framework_2016_CVPR_paper.html)
Supplement: Supplementary file 1 [file Danelljan_A_Probabilistic_Framework_2016_CVPR_supplemental.zip]

# Supplementary Material

## A Probabilistic Framework for Color-Based Point Set Registration

Martin Danelljan, Giulia Meneghetti, Fahad Shahbaz Khan, Michael Felsberg

Computer Vision Laboratory, Department of Electrical Engineering, Linköping University, Sweden

{martin.danelljan, giulia.meneghetti, fahad.khan, michael.felsberg}@liu.se

In this supplementary material of [1] we provide additional derivations. In section 1 we derive the expression of the latent posteriors, given in eq. (16) in [1]. Section 2 gives a derivation of the loss function stated in eq. (18) in [1]. In section 3 we derive the update of the feature component weights, given in eq. (19) in [1]. Finally, additional analysis of parameter settings is given in section 4.

### 1. Derivation of the Latent Posteriors $\alpha_{ijkl}^{(n)}$

Here, we derive the expression of the latent posteriors  $\alpha_{ijkl}^{(n)}$  given in eq. (16) in [1]. By using the factorization (10) in [1], along with the definitions of the individual factors (see (1), (11) and (12) in [1]) we obtain the following expression of the complete-data likelihood of the observation  $(\mathbf{x}_{ij}, y_{ij})$  (also given in (15) in [1] for  $k \neq 0$ ),

$$p(\mathbf{x}_{ij}, y_{ij}, C_{ij} = l, Z_{ij} = k | \Theta) = \begin{cases} \pi_k \rho_{kl} B_l(y_{ij}) \mathcal{N}(\phi_i(\mathbf{x}_{ij}); \boldsymbol{\mu}_k, \Sigma_k), & k \neq 0 \\ \frac{\pi_0}{L} \mathcal{U}_U(\phi_i(\mathbf{x}_{ij})) \mathcal{U}_\Omega(y), & k = 0. \end{cases} \quad (1)$$

The observed data-likelihood for  $(\mathbf{x}_{ij}, y_{ij})$  is obtained by marginalizing over the latent variables  $(C_{ij}, Z_{ij})$ ,

$$\begin{aligned} p(\mathbf{x}_{ij}, y_{ij} | \Theta) &= \sum_{k=0}^K \sum_{l=1}^L p(\mathbf{x}_{ij}, y_{ij}, C_{ij} = l, Z_{ij} = k | \Theta) \\ &= \sum_{k=1}^K \sum_{l=1}^L \pi_k \rho_{kl} B_l(y_{ij}) \mathcal{N}(\phi_i(\mathbf{x}_{ij}); \boldsymbol{\mu}_k, \Sigma_k) + \pi_0 \mathcal{U}_U(\phi_i(\mathbf{x}_{ij})) \mathcal{U}_\Omega(y). \end{aligned} \quad (2)$$

The set  $U \subset \mathbb{R}^3$  is selected to contain all observed points. The last term in (2), which corresponds to the uniform component, is therefore a constant  $\lambda$ , given by

$$\lambda := \pi_0 \mathcal{U}_U(\phi_i(\mathbf{x}_{ij})) \mathcal{U}_\Omega(y) = \frac{\pi_0}{m(U)m(\Omega)}. \quad (3)$$

Here,  $m$  denotes the reference measure of the probability densities for the respective spaces (*i.e.* the Lebesgue measure in the spatial case). The latent posteriors are given by the conditional probabilities,

$$\alpha_{ijkl}^{(n)} := p(Z_{ij} = k, C_{ij} = l | \mathbf{x}_{ij}, y_{ij}, \Theta^{(n)}) = \frac{p(\mathbf{x}_{ij}, y_{ij}, C_{ij} = l, Z_{ij} = k | \Theta^{(n)})}{p(\mathbf{x}_{ij}, y_{ij} | \Theta^{(n)})}. \quad (4)$$

Here,  $\Theta^{(n)}$  denotes the model parameter estimate obtained in EM-iteration  $n$ . By using (1), (2) and (3) in (4) we obtain,

$$\alpha_{ijkl}^{(n)} = \frac{\pi_k^{(n)} \rho_{kl}^{(n)} B_l(y_{ij}) \mathcal{N}(\phi_i^{(n)}(\mathbf{x}_{ij}); \boldsymbol{\mu}_k^{(n)}, \Sigma_k^{(n)})}{\sum_{q=1}^K \sum_{r=1}^L \pi_q^{(n)} \rho_{qr}^{(n)} B_r(y_{ij}) \mathcal{N}(\phi_i^{(n)}(\mathbf{x}_{ij}); \boldsymbol{\mu}_q^{(n)}, \Sigma_q^{(n)}) + \lambda}, \quad k \neq 0. \quad (5)$$

These are the latent posteriors  $\alpha_{ijkl}^{(n)}$  obtained in EM-iteration  $n$ , also stated in eq. (16) in [1].

## 2. Derivation of the Loss $g(\Theta; \Theta^{(n)})$

In this section, we derive the loss  $g(\Theta; \Theta^{(n)})$  (eq. (18) in [1]) that is used in the M-step of the EM procedure. In the M-step, the aim is to maximize the expected complete-data log likelihood  $Q(\Theta; \Theta^{(n)})$ . For the proposed model, this is given by eq. (17) in [1],

$$Q(\Theta; \Theta^{(n)}) = \mathbb{E}_{\mathcal{Z}|\mathcal{X}, \Theta^{(n)}} [\log p(\mathcal{X}, \mathcal{Z}|\Theta)] = \sum_{ijkl} \alpha_{ijkl}^{(n)} \log p(\mathbf{x}_{ij}, y_{ij}, C_{ij} = l, Z_{ij} = k|\Theta). \quad (6)$$

By using the formula (1) for the complete-data likelihood of each observation, we obtain

$$\begin{aligned} Q(\Theta; \Theta^{(n)}) &= \sum_{ijl} \sum_{k=1}^K \alpha_{ijkl}^{(n)} \left( \log \pi_k + \log \rho_{kl} + \log B_l(y_{ij}) - \frac{3}{2} \log \pi - \frac{1}{2} \log |\Sigma_k| - \frac{1}{2} \|R_i \mathbf{x}_{ij} + \mathbf{t}_i - \boldsymbol{\mu}_k\|_{\Sigma_k^{-1}}^2 \right) \\ &\quad + \sum_{ijl} \alpha_{ij0l}^{(n)} \log \frac{\lambda}{L}. \end{aligned} \quad (7)$$

Here,  $\lambda$  is the constant defined in (3). To simplify the expression (7), we omit constant terms. In our case, the terms  $\log B_l(y_{ij})$  and  $\frac{3}{2} \log \pi$  do not depend on the model parameters. The last term is also a constant, since  $\pi_0$  is a fix meta parameter. By omitting these unnecessary terms in (7), we obtain the equivalent loss,

$$g(\Theta; \Theta^{(n)}) = \sum_{ij} \sum_{k=1}^K \sum_{l=1}^L \alpha_{ijkl}^{(n)} \left( \frac{1}{2} \log |\Sigma_k| + \frac{1}{2} \|R_i \mathbf{x}_{ij} + \mathbf{t}_i - \boldsymbol{\mu}_k\|_{\Sigma_k^{-1}}^2 - \log \pi_k - \log \rho_{kl} \right). \quad (8)$$

This loss is then employed in the M-step of our EM procedure.

## 3. Derivation of the Optimal Feature Component Weights $\rho_{kl}^{(n)}$

Here, we derive the formula, stated in eq. (20) in [1], for updating the feature component weights  $\rho_{kl}$ . In the M-step of our EM-procedure, the feature component weights  $\rho_{kl}$  are updated by minimizing the loss (8) (*i.e.* eq. (19) in [1]). Since only the last term in (8) depends on  $\rho_{kl}$ , we obtain the equivalent optimization problem,

$$\text{minimize} \quad \varepsilon = - \sum_{ij} \sum_{k=1}^K \sum_{l=1}^L \alpha_{ijkl}^{(n)} \log \rho_{kl} \quad (9a)$$

$$\text{subject to} \quad \sum_{l=1}^L \rho_{kl} = 1, \quad k = 1, \dots, K \quad (9b)$$

Here, the constraints in (9b) ensure that the feature component weights sum up to one. By introducing Lagrange multipliers  $\eta_k$ , we obtain

$$\mathcal{L} = - \sum_{ij} \sum_{k=1}^K \sum_{l=1}^L \alpha_{ijkl}^{(n)} \log \rho_{kl} + \sum_{k=1}^K \eta_k \left( \sum_{l=1}^L \rho_{kl} - 1 \right). \quad (10)$$

Differentiation with respect to  $\rho_{kl}$  gives,

$$\frac{\partial \mathcal{L}}{\partial \rho_{kl}} = - \frac{1}{\rho_{kl}} \sum_{ij} \alpha_{ijkl}^{(n)} + \eta_k. \quad (11)$$

The optimum  $\rho_{kl}^{(n)}$  is obtained by setting the partial derivatives (11) to zero,

$$\begin{aligned} \frac{\partial \mathcal{L}}{\partial \rho_{kl}} = 0 &\iff \\ \rho_{kl}^{(n)} &= \frac{1}{\eta_k} \sum_{ij} \alpha_{ijkl}^{(n)} \end{aligned} \quad (12)$$

The Lagrange multipliers  $\eta_k$  are computed by summing both sides of (12) over  $l$  and using the constraint (9b),

$$\begin{aligned} \sum_{l=1}^L \rho_{kl}^{(n)} &= \sum_{l=1}^L \frac{1}{\eta_k} \sum_{ij} \alpha_{ijkl}^{(n)} \iff \\ 1 &= \frac{1}{\eta_k} \sum_{ij} \sum_{l=1}^L \alpha_{ijkl}^{(n)} \iff \\ \eta_k &= \sum_{ij} \sum_{l=1}^L \alpha_{ijkl}^{(n)} = \sum_{ij} \alpha_{ijk}^{(n)} \end{aligned} \quad (13)$$

In the last equality we have used the definition  $\alpha_{ijk}^{(n)} = \sum_{l=1}^L \alpha_{ijkl}^{(n)}$  (section 4.2 in [1]). By using (13) in (12), we obtain eq. (20) in [1] as

$$\rho_{kl}^{(n)} = \frac{\sum_{ij} \alpha_{ijkl}^{(n)}}{\sum_{ij} \alpha_{ijk}^{(n)}}, \quad k = 1, \dots, K. \quad (14)$$

#### 4. Parameter variations

Here, we provide further analysis of the parameters used in our approach. We investigate the impact of varying the number of spatial components  $K$  (fig. 1) and outlier ratio parameter  $\pi_0$  (fig. 2). Our results remain stable to parameter perturbations. Additionally, our method achieves a consistent improvement over JRMPS [2] in both accuracy and robustness, independent of parameter settings.

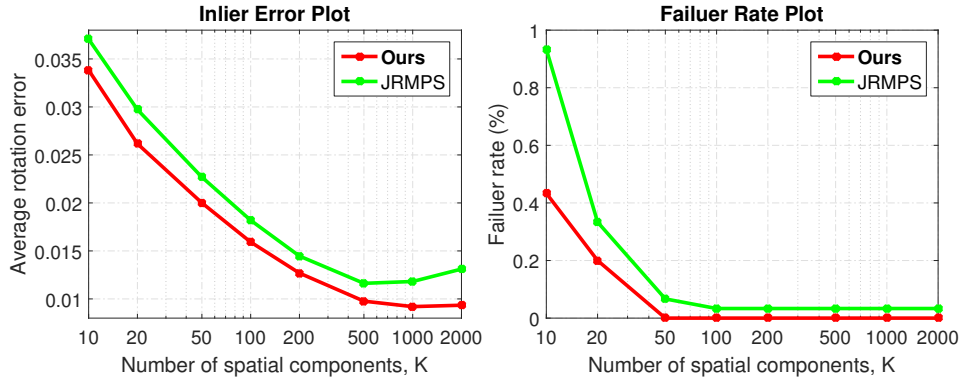

Figure 1. Analysis of the number of spatial components  $K$ . We show the average inlier rotation error (left) and failure rate (right) for our color-based method (red) and the baseline JRMPS (green).

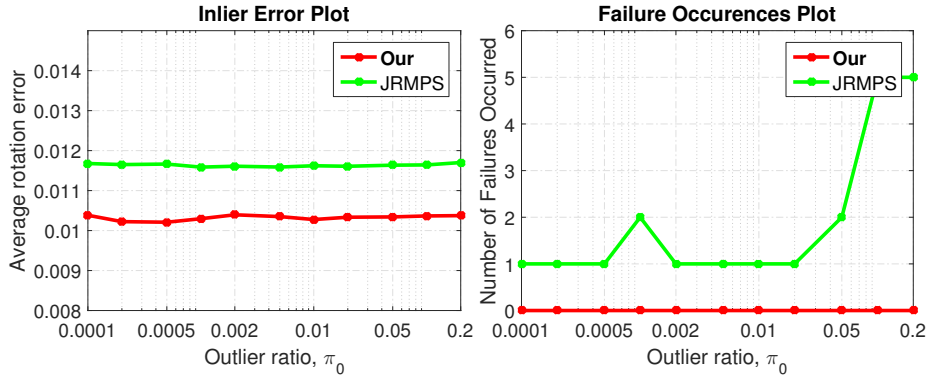

Figure 2. Analysis of the outlier ratio parameter  $\pi_0$ . We show the average inlier rotation error (left) and failure rate (right) for our color-based method (red) and the baseline JRMPS (green).

## References

- [1] M. Danelljan, G. Meneghetti, F. Shahbaz Khan, and M. Felsberg. A probabilistic framework for color-based point set registration. In *CVPR*, 2016. [1](#), [2](#), [3](#)
- [2] G. D. Evangelidis, D. Kounades-Bastian, R. Horaud, and E. Z. Psarakis. A generative model for the joint registration of multiple point sets. In *ECCV*, 2014. [3](#)
